# Supplementary material for: Mapping the molecular motions of 5-HT3 serotonin-gated channel by voltage-clamp fluorometry
Source: eLife. 2024 Jun 24;12:RP93174. doi: 10.7554/eLife.93174 (PMC11196107; doi:10.7554/eLife.93174)
Supplement: Figure 1—figure supplement 1—source data 1. [file elife-93174-fig1-figsupp1-data1.xlsx]

## Sheet: Sheet1
	WT + pharmaco dose responses
		varenicline								5HT								mCPBG
	0.001																	0	0	0	0	0	0
	0.01	0	0	0	0	0				0	0	0	0	0	0	0	0	0.00634704	0	0	0	0	0
	0.1	0	0	0	0	0				0.0123555	0.0004613	0.00107281	0.00301277	0	0.00684916	0	0	0.0146663	0	0.0415967	0.00530246	0.00672	0.004449
	0.5	0.008132	0	0	0	0				0.0517388	0.0654581	0.0274367	0.012744	0.0950645	0.0365364	0.00176831	0.0104832	0.498261	0.220541	0.545746	0.0498864	0.12485	0.203095
	1	0.014586	0.000366	0.00519	0.000783	0.004248				0.29854	0.331281	0.129993	0.0789949	0.529477	0.374256	0.405146	0.206331	0.869868	0.428847	0.727151	0.126501	0.612533	0.54453
	5	0.080418	0.067686	0.087581	0.101002	0.105127				0.936961	1.00155	0.86971	0.878826	0.904497	0.74721	0.695942	0.739854	0.893068	0.665164	0.771317	0.598095	0.816216	0.785518
	10									0.945095		0.887469	0.946644		0.799286	0.949354	0.993944	1		0.826055	1	0.83114	0.849317
	50	0.762489	0.756635	0.886006	0.801746	0.847012				1	1	1	1	1	1	1	1	0.948793	1	1	0.977167	1	1
	100	0.882664	0.907083	0.826135	0.902971	0.926578
	200	1	1	1	1	1
		5-HT										mCPBG										Varenicline										Alosetron										Granisetron
	current	1	1	1	1	1	1					0.895007	0.809686	0.987825	0.908015	0.895061	1.01794					0.587699	0.398864	0.23421	0.50645	0.202239	0.398888					0	0	0	0	0						0	0	0	0	0
	WT + mutations
	5-HT	wild-type courant								WT + Y207W								WT + N101K								I160C
	0.01	0	0	0	0	0	0	0	0	0	0	0	0	0												0	0	0	0	0
	0.1	0.0123555	0.0004613	0.00107281	0.00301277	0	0.00684916	0	0	0	0	0	0	0				0	0			0	0			0	0	0	0	0
	0.5	0.0517388	0.0654581	0.0274367	0.012744	0.0950645	0.0365364	0.00176831	0.0104832				0	0				0	0							0	0	0	0	0
	1	0.29854	0.331281	0.129993	0.0789949	0.529477	0.374256	0.405146	0.206331	0.0419779	0.0265556	0.0575148	0.0605724	0.0171657	0.0422262			0	0	0.00387847	0	0.00052022	0			0	0	0	0	0.004545
	5	0.936961	1.00155	0.86971	0.878826	0.904497	0.74721	0.695942	0.739854	0.244041	0.253928	0.323899	0.332685	0.237516	0.319821			0	0	0.0122818	0					0	0.005715	0.014234	0.01534	0.02201
	10	0.945095		0.887469	0.946644		0.799286	0.949354	0.993944	0.425827	0.406191	0.498259	0.440771	0.506083	0.494046			0.0130944	0.00392413	0.0542986	0.00807985	0.0286123	0.0456695			0.086454	0.062147	0.171132	0.210553	0.169132
	50	1	1	1	1	1	1	1	1	0.817325		0.736492	0.683338	0.905893	0.734229			0.241213	0.173534	0.444732	0.451521	0.359865	0.469997			0.507384	0.592898	0.736184	0.803097	0.818125
	100									0.936855	0.864236	0.951869	0.845327	0.923667	0.896124					0.751131	0.866445	0.695019	0.5235			0.791578	0.841522	0.925641	0.872207	1
	200									1	1	1	1	1	1			0.72295	0.862219	0.894635	1	0.935752	0.854567
	1000																	1	1	1		1	1			1	1	1	1
	panel B --> see in respective mutations source code
