# Supplementary material for: Mapping the molecular motions of 5-HT3 serotonin-gated channel by voltage-clamp fluorometry
Source: eLife. 2024 Jun 24;12:RP93174. doi: 10.7554/eLife.93174 (PMC11196107; doi:10.7554/eLife.93174)
Supplement: Figure 1—figure supplement 2—source data 1. [file elife-93174-fig1-figsupp2-data1.xlsx]

## Sheet: Sheet1
	tau - all constructs
		WT											S204C											I160C/Y207W mCPBG											V106C/L131W											V106C/L131W mCPBG
	50		43397.3	27320.5	138296	53851.9	47224.7						89863.1	85196.2	36958.1	157284	110969	172076	384895	118368	283854	52539.8		180810	99470.4	124561	219131	24919.6							28600	138441	189444	205978	197472	34723.2	23897.1	31302	20446.3	5095.79	8929.95	10659	9684.97	11197.8	10065.8
	100		44363.2	36985.3	74980.1	49671.7	34176.2						63915	76723.9	23736	153595	88870.8	90124	80998.4	71453.3	129538	39032.9		59224.4	58383.1	97272.3	131141	20316.4							20812.4	132707	135945	170694	50051.8	22577	14983.3	15112.6	11279.3	4614.67	6373.19	8927.78	6557.6	7808.75	8281.22
	% desensitization	WT											S204C											I160C/Y207W mCPBG											V106C/L131W											V106C/L131W mCPBG
	50	83.2985	65.9872	69.5314	57.2592	62.165	50.2013						74.5083	83.1524	81.4819	90.474	43.0942							54.047	52.6242	60.5812	65.2171	23.9229							55.2572	74.4915	65.5577	71.7077	45.8998	19.9581	23.4129	33.4357	22.7553	0	0.779577	8.48891	1.2852	3.47666	3.64577
	100	71.1843	52.5815	62.4742	48.6711	40.5109	43.4031						67.6009	64.8606	63.246	75.8328	31.2078							40.3927	37.6065	45.1844	50.4145	12.8349							45.8706	64.4511	58.2873	63.0655	25.8307	11.5041	14.1876	17.054	16.3037	0	0.127768	1.58458	0.562329	0	0
[truncated: 17 more columns]
