# Supplementary material for: Mapping the molecular motions of 5-HT3 serotonin-gated channel by voltage-clamp fluorometry
Source: eLife. 2024 Jun 24;12:RP93174. doi: 10.7554/eLife.93174 (PMC11196107; doi:10.7554/eLife.93174)
Supplement: Figure 1—source data 1. [file elife-93174-fig1-data1.xlsx]

## Sheet: Sheet1
	A11W/F80C	A11W/F80C fluo	L15C	L15C fluo	F80C	F80C fluo	160C	I160C fluo	I160C/Y207W	I160C/Y207W fluo	D202C	D202C fluo	D202C/I180W	D202C/I180W fluo	S204C	S204C fluo	V106C	V106C fluo	V106C/L131W	V106C/L131W fluo	V106C/V132W	V106C/V132W fluo	V104C/V132W	V104C/V132W fluo	R219C	R219C fluo	R219C/Y140W	R219C/Y140W fluo	R219C/F142W	R219C/F142W fluo	L221C	L221C fluo	L221C/A277W	L221C/A277W fluo	L228C	L228C fluo	L228C/L452W	L228C/L452W fluo
	0	0	-0.6516	0	0	0	-0.6656	0.0041	-0.131	0.052	-0.3397	0.0031	0	0	-1.7274	0.0033	-1.0593	0.0021	-0.798	0.0244	-3.074	0	-1.2279	0.0007	-1.4011	0.0024	-1.4695	0.0075	-0.0385	0.0006	-3.3508	0.0041	0	0	-1.0552	0.0018	-0.1273	0
	0	0	-1.3217	0	0	0	-2.5399	0.0077	-0.0327	0.0143	-0.2039	0.0003	0	0	-0.8334	0.0021	-1.1361	0	-1.7459	0.0232	-0.8142	0.0027	-0.0913	0.0013	-0.1465	0.0013	-1.543	0.011	-0.0424	0.0009	-1.2385	0	0	0	-1.5369	0	-0.4355	0.0023
	0	0	-1.3217	0	0	0	-2.6639	0.0073	-0.0198	0.0113	-1.5103	0.0006	0	0	-1.185	0.0055	-3.1207	0	-1.3132	0.0082	-1.2759	0.0015	-0.1523	0.0033	-1.2711	0.0143	-0.9793	0.0128	-0.6653	0.0146	-0.8975	0.0012	0	0	-1.8347	0.0007	-1.2421	0.0001
	0	0	-3.3038	0.0009	0	0	-0.5484	0	-0.0739	0.007	-0.5051	0.003	0	0	-1.8076	0.0137	-1.4847	0.0012	-1.6792	0.0154	-3.121	0.0006	-0.4123	0.0016	-1.4069	0.0027	-0.3082	0.014	-0.2731	0.0146	-0.4028	0.0012	0	0	-1.3728	0	-2.6987	0.0027
	0	0	-1.9489	0.0006	0	0	-0.7538	0	-0.0562	0.0056	-0.0369	0.0018	0	0	-1.4355	0.0131	-2.1683	0.0034	-3.2727	0.0345	-0.043	0.0018	-1.1462	0.002	-1.5643	0.0092	-0.9205	0.0092	-0.1285	0.0058	-0.7175	0.0012	0	0	-0.032	0	-1.0516	0.0009
			-2.5891	0			-1.7355	0	-0.041	0.007					-2.4271	0.0098			-1.9037	0.0079							-0.8157	0.0055	-0.2191	0.0195
			-2.8522	0.0012			-3.3677	0	-0.0171	0.02841					-2.8712	0.0031			-0.4703	0.0067							-1.1469	0.0067	-0.3308	0.0093
							-1.1222	0.0028	-0.2957	0.0234					-4.2599	0.0333											-1.9684	0.0229	-0.3905	0.0165
									-0.1281	0.0126					-1.7291	0.0186											-1.6187	0.0635
															-3.9911	0.0256											-1.9846	0.0228
																											-1.4041	0.0098
																											-0.5304	0.0159
																											-0.4349	0.0204
