# Supplementary material for: Mapping the molecular motions of 5-HT3 serotonin-gated channel by voltage-clamp fluorometry
Source: eLife. 2024 Jun 24;12:RP93174. doi: 10.7554/eLife.93174 (PMC11196107; doi:10.7554/eLife.93174)
Supplement: Figure 2—source data 1. [file elife-93174-fig2-data1.xlsx]

## Sheet: Sheet1
S204C
5HT	current normalized								deltaF/F normalized								current normalized unlabelled								wild-type current
0.001	0	0	0	0	0	0			0	0	0	0	0	0			0	0	0	0	0	0			0	0	0	0	0	0	0	0
0.1	0.00682689	0	0.00215938	0.00918792	0	0			0	0	0	0	0	0			0.0126902	0.00428959	0.00896422	0	0.003229	0.011948			0.0123555	0.0004613	0.00107281	0.00301277	0	0.00684916	0	0
0.5	0.0709857	0.00542155	0.208031	0.105352	0.007293	0.042219			0	0	0	0.141771	0	0			0.0281583	0.0499869	0.0574871	0.16037	0.22417	0.099916			0.0517388	0.0654581	0.0274367	0.012744	0.0950645	0.0365364	0.00176831	0.0104832
1	0.405643	0.125968	0.543536	0.524206	0.379124	0.215436			0.0817069	0.193793	0.407888	0.243795	0.150788	0.144894			0.193447	0.269807	0.242651	0.452745	0.598853	0.753302			0.29854	0.331281	0.129993	0.0789949	0.529477	0.374256	0.405146	0.206331
5	0.846952	0.779819	0.828121	0.813275	0.85761	0.745157			0.78502	0.6436	0.712802	0.518565	0.700141	0.721958			0.566829	0.626455	0.691442	0.704663	0.870385	0.98078			0.936961	1.00155	0.86971	0.878826	0.904497	0.74721	0.695942	0.739854
10	0.912853	0.908829	0.87493	0.86181	0.886116	0.802861			0.837082	0.804961	1.27525	0.660599	0.818207	0.92407			0.661469	0.7189	0.799339	0.754941	0.884993	0.988291			0.945095		0.887469	0.946644		0.799286	0.949354	0.993944
50	1	1	1	1	0.946359	0.84699			1	1	1	1	0.953025	0.900429			1	1	1	1	1	1			1	1	1	1	1	1	1	1
100	1	1	1	1	1	1			1	1	1	1	1	1
S204C
mCPBG	I						F						WT mCPBG						I unlabelled
0.001	0	0	0	0	0	0	0	0	0	0	0	0	0	0	0	0	0	0	0	0	0	0	0	0
0.01	0	0	0	0	0	0	0	0	0	0	0	0	0.00634704	0	0	0	0	0					0	0
0.1	0.001468	0	0	0.010708	0.009423	0.001949	0.069871	0	0	0	0.062812	0.021472	0.0146663	0	0.0415967	0.00530246	0.00672	0.004449	0.0162363	0.0296113	0.0224011	0.0158374	0.00550784	0.0133979
0.5	0.512654	0.002333	0.187614	0.338795	0.401984	0.116513	0.315689	0	0.303264	0.125642	0.223069	0.16118	0.498261	0.220541	0.545746	0.0498864	0.12485	0.203095		0.56363	0.420468	0.553466	0.397417	0.409432
1	0.705817	0.043513	0.474803	0.525293	0.680315	0.364741	0.466458	0	0.491986	0.270918	0.512721	0.339854	0.869868	0.428847	0.727151	0.126501	0.612533	0.54453	0.796215	0.782079	0.611814	0.882282	0.782801	0.727311
5	0.86261	0.595995	0.707271	0.755119	0.873206	0.715734	0.811734	0.56086	0.574572	0.485201	0.747129	0.498257	0.893068	0.665164	0.771317	0.598095	0.816216	0.785518	0.955775	0.92128	1.02696	0.986889
10	0.923322	0.704697	0.832574	0.861282	0.885567	0.758363	0.905131	0.677997	0.542341	0.535679	0.789673	0.542233	1		0.826055	1	0.83114	0.849317	0.889361	0.919046	1.01878	0.997915	1.00092	0.925971
50	1.04911	0.946513	0.979356	0.904095	0.960183	0.859639	1.15589	1.05562	0.752627	0.910375	0.979748	0.727295	0.948793	1	1	0.977167	1	1	1	1.01759	1	1	1	1
100	1	1	1	1	1	1	1	1	1	1	1	1							1	1	1	1	1	1
S204C
var
	I							F							I unlabelled							WT
0.001	0	0	0	0	0	0	0	0	0	0	0	0	0	0	0	0	0	0	0	0	0
0.01	0	0	0	0	0	0	0	0	0	0	0	0	0	0	0	0	0	0	0	0	0
0.1	0	0	0	0	0	0	0	0	0	0	0	0	0	0	0	0	0.000164415	0	0	0	0	0	0	0	0	0
0.5	0	0	0	0	0.00203	0	0	0	0	0	0	0	0	0	0	0	0.00142493	0.00491602	0.00304358	0.00173762		0.008132	0	0	0	0
1	0.000614	0	0.002506	0	0.008173	0.009029	0.001824	0.023198	0	0.062069	0	0.030282	0.09267	0.061452	0.00915179	0.00315473	0.0167429	0.00692339	0.00475095	0.00881221	0.0128465	0.014586	0.000366	0.00519	0.000783	0.004248
5	0.155596	0.109313	0.02713	0.092974	0.050497	0.103861	0.077208	0.172884	0.096525	0.234483	0.222418	0.180727	0.277562	0.173224	0.116488	0.00592706	0.262489	0.151536	0.177715	0.178189	0.161339	0.080418	0.067686	0.087581	0.101002	0.105127
10	0.264275	0.315634		0.224419	0.244261	0.333583	0.329199	0.330237	0.197282		0.425001	0.319412	0.408569	0.335157							0.370423
50	0.792028	0.75545	0.698736	0.669249				0.862647	0.637951	0.834483	0.836364				0.845086	0.568806	0.91138	0.848177	0.90023	0.845476	0.768157	0.762489	0.756635	0.886006	0.801746	0.847012
100	0.948851	0.943853	0.926128	0.980764	0.87964	0.895191	0.949663	0.961538	0.924408	0.972414	0.893142	0.751791	0.927638	0.943434	0.904027	0.699106	0.975447	0.937362	0.941059	0.924165	0.929395	0.882664	0.907083	0.826135	0.902971	0.926578
200	1	1	1	1	1	1	1	1	1	1	1	1	1	1	1	1	1	1	1	1	1	1	1	1	1	1
S204C
pharmaco	5-HT										mCPBG										Varenicline										Alosetron										Granisetron
fluo	1	1	1	1	1	1	1				1.2443	0.878117	1.05105	1.64847	0.895734	0.996454	0.910013				0.924726	0.954464	0.794952	2.06943	1.12923	0.937122	1.00796				1.21813	1.16086	0.96188	2.29485	1.76229	1.24691					1.00468	0.829579	0.859407	1.93309	1.49285	0.726457
		5-HT										mCPBG										Varenicline										Alosetron										Granisetron
current		1	1	1	1	1	1	1				0.651262	0.798863	0.858609	0.933723	0.875407	1.00058	0.942431				0.072316	0.188782	0.322589	0.283123	0.452022	0.496625	0.507093				0	0	0	0	0	0	0				0	0	0	0	0	0	0
S204C + N101K
5HT
	current normalized								deltaF/F normalized								current normalized (non marqué)								wild-type current								+ N101K current								+ N101K fluo
0.001	0	0	0	0	0	0			0	0	0	0	0	0			0	0	0	0	0	0			0	0	0	0	0	0	0	0
0.1	0.00682689	0	0.00215938	0.00918792	0	0			0	0	0	0	0	0			0.0126902	0.00428959	0.00896422	0	0.003229	0.011948			0.0123555	0.0004613	0.00107281	0.00301277	0	0.00684916	0	0					0	0							0	0
0.5	0.0709857	0.00542155	0.208031	0.105352	0.007293	0.042219			0	0	0	0.141771	0	0			0.0281583	0.0499869	0.0574871	0.16037	0.22417	0.099916			0.0517388	0.0654581	0.0274367	0.012744	0.0950645	0.0365364	0.00176831	0.0104832					0	0							0	0
1	0.405643	0.125968	0.543536	0.524206	0.379124	0.215436			0.0817069	0.193793	0.407888	0.243795	0.150788	0.144894			0.193447	0.269807	0.242651	0.452745	0.598853	0.753302			0.29854	0.331281	0.129993	0.0789949	0.529477	0.374256	0.405146	0.206331	0	0	0	0	0	0			0.070004	0.139282	0.080661	0.170712	0.111493	0.094919
5	0.846952	0.779819	0.828121	0.813275	0.85761	0.745157			0.78502	0.6436	0.712802	0.518565	0.700141	0.721958			0.566829	0.626455	0.691442	0.704663	0.870385	0.98078			0.936961	1.00155	0.86971	0.878826	0.904497	0.74721	0.695942	0.739854	0	0	0	0	0.00073	0.006037			0.214956	0.272765	0.15925	0.281402	0.205833	0.174439
10	0.912853	0.908829	0.87493	0.86181	0.886116	0.802861			0.837082	0.804961	1.27525	0.660599	0.818207	0.92407			0.661469	0.7189	0.799339	0.754941	0.884993	0.988291			0.945095		0.887469	0.946644		0.799286	0.949354	0.993944	0	0	0	0	0.003129	0.019619			0.450306	0.652723	0.34127	0.503072	0.382344	0.320217
50	1	1	1	1	0.946359	0.84699			1	1	1	1	0.953025	0.900429			1	1	1	1	1	1			1	1	1	1	1	1	1	1	0.56599	0.468261	0.355072	0.332298	0.406758	0.429882			0.82724	0.929168	0.728316	0.803308	0.954374	0.770063
100	1	1	1	1	1	1			1	1	1	1	1	1																			0.84264	0.857378	0.717391	0.65528	0.791615	0.83492			1	1	1	1	1.02869	0.936753
200
1000																																	1	1	1	1	1	1							1	1
S204C + N101K
mCPBG	S204C + N101K current								S204C + N101K fluo
0.001	0	0	0	0	0	0	0		0	0	0	0	0	0	0
0.01	0	0	0	0	0	0	0		0	0	0	0	0	0	0
0.1	0	0	0	0	0	0	0		0.186407	0.095197	0.063738	0.029821	0.112934	0.052088	0.046688
0.5
1	0	0.004136	0.000493	0.009428	0	0.011837	0.005963		0.370166	0.346655	0.290853	0.159762	0.302612	0.372812	0.174779
5
10	0.419896	0.486287	0.230087	0.265023	0.35638	0.543129	0.647643		0.503968	0.715973	0.545978	0.470053	0.484329	0.717631	0.620172
50	0.796765	0.844062	0.719522	0.851151	0.854413	0.925034	0.840875		0.820634	0.99414	0.7665	0.858414	0.937552	0.902854	0.852484
100	0.903265	0.923051	0.900018	0.977079	1.04928	0.937143	0.9547		0.841605	1.03744	0.833512	0.968028	0.826824	0.992148	0.960547
200	1	1	1	1	1	1	1		1	1	1	1	1	1	1
S204C + N101K
var	fluo varenicline
0.001
0.1	0	0	0	0	0	0	0
0.5
1	0.059594	0.202585	0.094193	0.124693	0.190324	0.073366	0.070168
5
10	0.370367	0.277185	0.249841	0.377179	0.299524	0.302933	0.260802
50	0.675791	0.714732	0.698737	0.476238	0.397479	0.649152	0.618699
100	0.812219	0.814604	0.797863	0.657573	0.554857	0.728418	0.892843
200	0.967337	0.967105	0.965607	0.902264	0.878326	0.977551	0.92923
400	1	1	1	1	1	1	1
S204C +N101K
pharmaco	5-HT										mCPBG										Varenicline										Alosetron										Granisetron
fluo	1	1	1	1	1	1	1	1			1.52385	1.15104	1.28238	1.00083	1.26955	1.24648	1.13468	1.25162			1.68649	1.6592	1.86617	1.91869	1.55217	1.89285	1.68042	1.59381
		5-HT										mCPBG										Varenicline										Alosetron										Granisetron
current		1	1	1	1	1	1	1	1			1.95498	1.80986	2.33743	1.72173	1.73649	1.96517	1.36819	1.47247			0	0	0	0	0	0	0	0
