# Supplementary material for: Mapping the molecular motions of 5-HT3 serotonin-gated channel by voltage-clamp fluorometry
Source: eLife. 2024 Jun 24;12:RP93174. doi: 10.7554/eLife.93174 (PMC11196107; doi:10.7554/eLife.93174)
Supplement: Figure 2—source data 2. [file elife-93174-fig2-data2.xlsx]

## Sheet: Sheet1
I160C/Y207W
5-HT	wild-type courant								I160C/Y207W courant								I160C/Y207W fluo								I160C/Y207W unlabelled current
0.001	0	0	0	0	0	0	0	0	0	0	0	0	0	0			0	0	0	0		0	0
0.01	0	0	0	0	0	0	0	0	0	0	0	0	0	0	0		0	0	0	0		0	0			0	0	0	0	0	0
0.1	0.0123555	0.0004613	0.00107281	0.00301277	0	0.00684916	0	0	0	0	0	0	0	0	0		0	0	0	0		0	0			0	0	0	0	0	0
0.5	0.0517388	0.0654581	0.0274367	0.012744	0.0950645	0.0365364	0.00176831	0.0104832	0	0	0	0	0	0	0		0	0	0	0		0	0.060208
1	0.29854	0.331281	0.129993	0.0789949	0.529477	0.374256	0.405146	0.206331	0	0	0	0.020967	0	0	0		0	0	0	0	0.122688	0.115183	0.104094			0	0	0.0101407	0.00241546	0.000505988	0.000300707
5	0.936961	1.00155	0.86971	0.878826	0.904497	0.74721	0.695942	0.739854	0.009174	0	0	0.144741	0	0	0		0.229907	0.264456	0.174301	0.374955		0.379103	0.406908			0.0170897	0.0332023
10	0.945095		0.887469	0.946644		0.799286	0.949354	0.993944	0.143731	0	0.151613	0.595198	0.101093	0.106557	0.057285		0.458103	0.309052	0.350574	0.490412	0.26007	0.549054	0.420368			0.0885787	0.246707	0.230373	0.115658	0.10086	0.049767
50	1	1	1	1	1	1	1	1	0.535168	0.60101	0.632258	0.722354	0.84153	0.778689	0.391034		0.935293	1.03697	0.90133	1.17149	0.870523	0.983461	0.919406			0.296954	0.926522	0.580635	0.558895	0.506746	0.364306
100	1	1	1	1	1	1	1	1	1	1	1	1	1	1	0.551681		1	1	1	1	0.978269	1	1			0.769882	0.89949	0.775025	0.68798	0.582982	0.424673
200															1						1							0.919693	0.799446	0.774077	0.697865
300
500																										1	1	1	1	1	1
I160C/Y207W
mCPBG	I								F								I non marqué								WT
0.001	0	0	0	0	0	0	0	0	0	0	0	0	0	0	0	0	0	0	0	0	0	0	0	0	0	0	0	0	0	0
0.01	0	0	0	0	0	0	0	0	0	0	0	0	0	0	0	0	0	0	0	0	0	0	0	0	0.00634704	0	0	0	0	0
0.1	0	0	0	0	0	0	0	0	0	0	0	0	0	0	0	0	0.0061849	0	0	0.00448212	0.000198118	0	0.00231744	0	0.0146663	0	0.0415967	0.00530246	0.00672	0.004449
0.5	0	0	0.00252082	0.00314835	0.00324171	0.0108895	0.0104978	0.00282045	0	0	0.0965975	0.0385475	0.0990522	0	0	0.0217388	0.0358073	0.0217801	0.00314157	0				0.0097733	0.498261	0.220541	0.545746	0.0498864	0.12485	0.203095
1	0.0185295	0.00442243	0.0134821	0.140911	0.00679426	0.161262	0.0246954	0.0214525	0.289317	0.208729	0.226976	0.138056	0.326071	0.131739	0.338069	0.0644654	0.0540365	0.032731	0.019733	0.320582	0.211441	0.435586	0.219921	0.0784887	0.869868	0.428847	0.727151	0.126501	0.612533	0.54453
5	0.38529	0.159137	0.556846	0.633476	0.203295	0.339934	0.423101	0.466593	0.313112	0.281725	0.345063	0.205401	0.707728	0.220923	0.776697	0.350399	0.772135	0.550222	0.676222	0.851558	0.787816	0.905997	0.768114	0.705693	0.893068	0.665164	0.771317	0.598095	0.816216	0.785518
10	0.514861	0.261949	0.556478	0.747136	0.479595	0.80652	0.537073	0.584389	0.550559	0.382723	0.527322	0.360799	0.689066	0.540804	0.843671	0.433508	0.823079	0.726167	0.807285	0.894382	0.849034	0.966251	0.794315	0.932997	1		0.826055	1	0.83114	0.849317
50	0.809688	0.654201	0.828329	0.869619	0.822195	0.988209	0.858896	0.923677	0.834713	0.865198	0.819408	0.676167	0.782122	0.871709	0.929184	0.800274	0.895833	0.973657	0.976635	0.923227	0.930807	0.995409	0.885925	1.00756	0.948793	1	1	0.977167	1	1
100	1	1	1	1	1	1	1	1	1	1	1	1	1	1	1	1	1	1	1	1	1	1	1	1
I160C/Y207W
var	I								F								wild-type courant
0.001									0	0	0	0	0	0	0
0.01									0	0	0	0	0	0	0
0.1									0	0	0	0	0	0	0		0	0	0	0	0
0.5									0	0	0.118757	0	0	0	0		0.008132	0	0	0	0
1									0	0	0.147612	0.065393	0.085776	0.074939	0.039663		0.014586	0.000366	0.00519	0.000783	0.004248
5									0.160729	0.224997	0.255043	0.20185	0.168521	0.195736	0.217706		0.080418	0.067686	0.087581	0.101002	0.105127
10									0.334452	0.291015		0.364441	0.3208	0.244308	0.265915
50									0.833446	0.678006	0.837274						0.762489	0.756635	0.886006	0.801746	0.847012
100									0.923853	0.928257	0.970738	0.95814	0.847094	0.851988	0.997282		0.882664	0.907083	0.826135	0.902971	0.926578
200									1	1	1	1	1	1	1		1	1	1	1	1
I160C/Y207W
pharmaco
	5-HT										mCPBG										Varenicline										Alosetron										Granisetron
fluo	1	1	1	1	1	1	1	1			1.03182	1.05378	1.35769	1.43769	1.40169	1.22344	0.983136	1.16537			1.34127	1.40895	1.67469	1.6921	1.45362	1.78469	1.34864	1.42225			2.01707	2.38332	2.59353	2.1959	2.56966	2.01119	2.03045				0.88142	1.18558	1.18023	1.03133	1.42697	1.20371	0.966568
	5-HT										mCPBG										Varenicline										Alosetron										Granisetron
current	0.0242873	0.0107996	0.0233474	0.00380522	0.00717095	0.0105258	0.0201423	0.037018			1	1	1	1	1	1	1	1			0	0	0	0	0	0	0	0			0	0	0	0	0	0	0				0	0	0	0	0	0	0
