# Supplementary material for: Mapping the molecular motions of 5-HT3 serotonin-gated channel by voltage-clamp fluorometry
Source: eLife. 2024 Jun 24;12:RP93174. doi: 10.7554/eLife.93174 (PMC11196107; doi:10.7554/eLife.93174)
Supplement: Figure 3—source data 1. [file elife-93174-fig3-data1.xlsx]

## Sheet: Sheet1
5-HT	V106C current									V106C/L131W current/labelled									wild-type current									V106C/L131W current unlabelled									V106C/L131W fluo
0.001	0	0	0	0	0					0	0	0	0	0					0	0	0	0	0	0	0	0		0	0	0	0	0	0	0	0	0	0	0	0	0	0
0.01	0	0	0	0	0					0	0	0.0792044	0.00488893	0.00803698					0	0	0	0	0	0	0	0		0	0	0	0	0	0	0	0	0	0	0	0.0894178	0.0382699	0.0696726
0.1	0	0	0.001955	0	0.01553					0.0229323	0.074632	0.167639	0.0896507	0.0791091					0.0123555	0.0004613	0.00107281	0.00301277	0	0.00684916	0	0		0	0.0145	0	0.0039	0.0075	0.0272	0	0.085	0.031	0.048931	0.214113	0.254009	0.142329	0.196055
0.5	0.044369	0.017252	0.037556	0	0.601203					0.353008	0.264104	0.319319	0.233783	0.214267					0.0517388	0.0654581	0.0274367	0.012744	0.0950645	0.0365364	0.00176831	0.0104832		0.0188	0.4265	0.0021	0.0741	0.144	0.0928	0.0665	0.467	0.4122	0.316876	0.242737	0.447376	0.406997	0.479778
1	0.156141	0.208344	0.186689	0.038585	0.235801					0.635965	0.31657	0.448368	0.662908	0.598151					0.29854	0.331281	0.129993	0.0789949	0.529477	0.374256	0.405146	0.206331		0.1111	0.5237	0.2179	0.3384	0.545	0.1315	0.4931	0.5134	0.6525	0.485011	0.370855	0.465507	0.919372	0.74128
5	0.430662	0.372678	0.739001	0.558127	0.456726					0.950376	0.598316	0.456586	0.786384	0.794453					0.936961	1.00155	0.86971	0.878826	0.904497	0.74721	0.695942	0.739854		0.6198	0.7603	0.6679	0.6868	0.8464	0.5334	0.6819	0.772	0.7063	0.751841	0.55031	0.510168	1.0108	0.808024
10	0.763145	0.556905	0.884129	0.515494	0.708263					0.868922	0.786414	0.631729	0.873682	0.956979					0.945095		0.887469	0.946644		0.799286	0.949354	0.993944		0.7616	0.8774	0.6953	0.778	0.8823	0.725	0.8813	0.8907	0.879	0.767669	0.740198	0.528324	1.02663	0.839105
50	1	1	1	1	0.931077					1	1	1	1	1					1	1	1	1	1	1	1	1		1	1	1	1	1	1	1	1	1	1	1	1	1	1
100	1	1	1	1	1					1	1	1	1	1					1	1	1	1	1	1	1	1		1	1	1	1	1	1	1	1	1	1	1	1	1	1
var	V106C/L131W current					V106C/L131W fluo					V106C/L131W current unlabelled					WT
0.001	0	0	0	0	0	0	0	0	0	0	0	0	0	0	0
0.01	0	0	0	0	0	0	0	0	0	0	0	0	0	0	0
0.1	0.004813	0.007726	0.005085	0	0.009865	0	0	0.183771	0	0	0.002163	0	0.000556	0	0.001159	0	0	0	0	0
0.5	0.080559	0.043263	0.145592	0	0.18057	0.292074	0.084715	0.367436		0.345449	0.006519	0.004236	0.001646	0.003437	0.003201	0.008132	0	0	0	0
1	0.190311	0.153816	0.301666	0.026793	0.319391	0.348535	0.410029	0.560959	0.229725	0.728295	0.027496	0.010497	0.015063	0.01151	0.0183	0.014586	0.000366	0.00519	0.000783	0.004248
5	0.349771	0.408606	0.416645	0.354216	0.48536	0.626617	0.625802	0.461287	0.791289	0.661029	0.580296	0.369771	0.48941	0.410258	0.421597	0.080418	0.067686	0.087581	0.101002	0.105127
10					0.585431					0.764648
50	0.644548	0.793263	0.816687	0.805162		0.803817	0.634956	0.625669	0.863561		0.884948	0.889807	0.956081	0.945348	0.850629	0.762489	0.756635	0.886006	0.801746	0.847012
100	0.832807	0.799985	0.906501	0.99409	0.865125	0.828377	0.820394	0.850657	0.83283	0.989372	0.95043	0.930143	0.980933	0.987525	0.933027	0.882664	0.907083	0.826135	0.902971	0.926578
200	1	1	1	1	1	1	1	1	1	1	1	1	1	1	1	1	1	1	1	1
V106C/L131W pharmaco
	5-HT										mCPBG										Varenicline										Alosetron										Granisetron
current	1	1	1	1	1	1					0.928947	0.688566	0.521885	0.549298	0.549298	0.611741					0.277486	0.215356	0.36433	0.236864	0.438038	0.440687					0	0	0	0	0	0					0	0	0	0	0	0
	5-HT										mCPBG										Varenicline										Alosetron										Granisetron
fluo	1	1	1	1	1	1					0.982826	1.0837	1.06817	0.911268	0.766001	0.752466					0.433322	0.604652	0.734002	0.397961	0.395517	0.399095					0	0	0	0	0	0					0	0	0	0	0	0
