# Supplementary material for: Mapping the molecular motions of 5-HT3 serotonin-gated channel by voltage-clamp fluorometry
Source: eLife. 2024 Jun 24;12:RP93174. doi: 10.7554/eLife.93174 (PMC11196107; doi:10.7554/eLife.93174)
Supplement: Figure 3—source data 2. [file elife-93174-fig3-data2.xlsx]

## Sheet: Sheet1
5-HT	R219C/Y140W current								R219C/Y140W fluo								R219C/Y140W current unlabelled								wild-type current
0.001	0	0	0	0	0	0	0	0	0	0	0	0	0	0	0	0	0	0	0	0					0	0	0	0	0	0	0	0
0.01	0	0.018859	0	0.020318	0.047023	0	0	0	0	0.01657	0	0.001067	0.128909	0	0	0	0.005392	0	0	0			0.035614		0	0	0	0	0	0	0	0
0.1	0.325286	0.452622	0.346821	0.335698	0.136478	0.058481	0.160183	0.294983	0.293753	0.14987	0.26637	0.318431	0.199657	0.249836	0.154721	0.188588	0.127662	0.019589	0.161926	0.181277	0.124444	0.018856			0.0123555	0.0004613	0.00107281	0.00301277	0	0.00684916	0	0
0.5	0.580265	0.743292	0.766667	0.647227	0.36878	0.254684	0.562929	0.831912	0.73862	0.386794	0.680094	0.63798	0.422578	0.54238	0.424293	0.685169	0.600839	0.565223	0.171835	0.722867	0.316672				0.0517388	0.0654581	0.0274367	0.012744	0.0950645	0.0365364	0.00176831	0.0104832
1	0.805591	0.901214	0.916667	0.743992	0.441129		0.589474	0.961142	0.817925	0.399283	0.771122	0.663889	0.432244		0.608217	0.859643	0.722048	0.668829	0.362206	0.854918	0.679027	0.75562	0.53443		0.29854	0.331281	0.129993	0.0789949	0.529477	0.374256	0.405146	0.206331
5	0.858005	0.943541	0.94382	0.804404	0.444979		0.76659	0.964911	0.965454	0.560777	0.848548	0.73481	0.508794		0.703358	1.02182	0.815467	0.85518	0.714386	0.982437	0.803322				0.936961	1.00155	0.86971	0.878826	0.904497	0.74721	0.695942	0.739854
10	0.907686	0.95784	0.977901	0.905557	0.607894	1.0662	0.695652	1.09943	0.967083	0.648324	0.840614	0.783733	0.738489	1.33466	0.824692	0.848725	1.0183	0.807416	0.864187	0.936164	0.897656	0.875453	0.897985		0.945095		0.887469	0.946644		0.799286	0.949354	0.993944
50	1	1	1	1	1	1	1	1.12546	1	1	1	1	1	1	1	0.921093	1	1	1	0.937233	0.900475	0.934799	0.950757		1	1	1	1	1	1	1	1
100	1	1	1	1	1	1	1	1	1	1	1	1	1	1	1	1	1	1	1	1	1	1	1
var	R219C/Y140W current						R219C/Y140W fluo						R219C/Y140W current unlabelled						Wild-type
0.001	0	0	0	0	0		0	0	0	0	0	0	0	0	0
0.01						0							0	0	0
0.1						0.002011							0	0.06924	0.016498	0.03256	0.007424	0.018856	0	0	0	0	0
0.5	0.373433	0.523411	0.416818	0.433362	0.379684	0.094417	0.364854	0.528818	0.324308	0.485518	0.34301		0.003931	0.244363	0.44146				0.008132	0	0	0	0
1	0.582816	0.672764	0.65787	0.668155	0.524403	0.253083	0.562105	0.752455	0.494997	0.607444	0.511608	0.074114	0.089221	0.327332	0.675069	0.588572	0.336025	0.75562	0.014586	0.000366	0.00519	0.000783	0.004248
5	0.634816	0.866782	0.868741	0.854478	0.778445	0.506748	0.774966	0.915283	0.830529	0.844584	0.726599	0.301457	0.618557	0.44108	0.904998				0.080418	0.067686	0.087581	0.101002	0.105127
10	0.78118	0.88283	0.915538	0.917167	0.81709		0.711215	0.978441	0.813466	0.927043	0.75968				0.940632	0.829223	0.864105	0.875453
50	0.9481	1.0344	0.943528	0.946438	0.871034	0.958931	0.845169	0.960194	0.938183	1.0166	0.967908	0.863657	0.854616	0.659597		0.969213	0.971584	0.949685	0.762489	0.756635	0.886006	0.801746	0.847012
100	0.952884	1.04423	0.966644	0.906667	0.975408	0.911723	0.866962	0.991519	0.937973	0.972467	1.08068	1.05647	0.988943	0.898482	0.939344	1	1	1	0.882664	0.907083	0.826135	0.902971	0.926578
200	1	1	1	1	1	1	1	1	1	1	1	1	1	1	1	1	1	1	1	1	1	1	1
R219C/Y140W	5-HT										mCPBG										Varenicline										Alosetron										Granisetron
current	1	1	1	1	1	1					0.817283	0.97469	1	0.738832	0.743347	1.3552					0.486298	0.486615	0.566036	0.397086	0.426877	0.480839					0	0	0	0	0	0					0	0	0	0	0	0
	5-HT										mCPBG										Varenicline										Alosetron										Granisetron
fluo	1	1	1	1	1	1					0.47743	0.639473	0.639473	0.535085	0.496806	0.935314					0.599493	0.115608	0.513871	0.255414	0.119689	0.458086					0	0	0	0	0						0	0	0	0	0
5-HT	+ N101K current									+N101K fluo
0.001	0	0	0				0	0	0	0	0	0				0	0	0
0.01	0	0	0			0.018648	0	0	0	0	0	0			0.075733	0	0	0
0.1	0	0	0				0.010562	0.006847	0	0	0	0				0	0.209871	0.122001
0.5
1	0.144244	0.326865	0.182177	0.195356	0.216917	0.426388	0.203591	0.100098	0.52906	0.203322	0.292623	0.341139	0.57374	0.480899	0.494485	0.486477	0.419461	0.518642
5	0.197322	0.329553	0.467926	0.743785	0.737959	0.671901	0.686471	0.794425		0.270036	0.350824	0.615405	1.03061	0.913502	0.722739	0.880087	0.658767
10	0.350534	0.683468	0.711211	0.836187	0.906944	0.906057	0.779245	0.803554	0.771926	0.626503	0.428528	0.781257	1.10227	1.1158	0.876976	0.954423	0.827271	0.885583
50	0.69124	0.910534	0.836057	0.91311	0.975044	0.944756	1.01408	0.942778	0.86213	0.779631	0.815826	0.858395	1.115	1.08797	0.89499	1.07953	0.957058	1.00063
100	1	1	1	1	1	1	1	1	1	1	1	1	1	1	1	1	1	1
200
R219C/Y140W + N101K
	5-HT										mCPBG										Varenicline										Alosetron										Granisetron
fluo	1	1	1	1	1	1	1				0.954563	1.53293	0.970624	1.26306	1.123	1.36158	1.16807				0.378817	0.309054	0.282881	0.267516	0.348685	0.698147	0.350457
	5-HT										mCPBG										Varenicline										Alosetron										Granisetron
current	1	1	1	1	1	1	1				0.530581	1.19001	0.80559	0.737505	0.768776	0.725094	1.07961				0.0137897	0.0117089	0.0272907	0.0120817	0.0179435	0.039704	0.0728236
var	+ N101K current								+N101K fluo
0.001
0.01	0	0	0			0.018648	0		0	0	0			0.075733	0
0.1	0	0	0				0.010562		0	0	0				0
0.5	0.017324	0.135081	0.027105			0.039821			0.068165	0.220418	0.11424			0.16032
1	0.144244	0.326865	0.182177	0.195356	0.216917	0.426388	0.203591		0.203322	0.292623	0.341139	0.57374	0.480899	0.494485	0.486477
5	0.197322	0.329553	0.467926	0.743785	0.737959	0.671901	0.686471		0.270036	0.350824	0.615405	1.03061	0.913502	0.722739	0.880087
10	0.350534	0.683468	0.711211	0.836187	0.906944	0.906057	0.779245		0.626503	0.428528	0.781257	1.10227	1.1158	0.876976	0.954423
50	0.69124	0.910534	0.836057	0.91311	0.975044	0.944756	1.01408		0.779631	0.815826	0.858395	1.115	1.08797	0.89499	1.07953
100	1	1	1	1	1	1	1		1	1	1	1	1	1	1
